# 1 **Luigi: Large-scale histopathological image retrieval system using** 2 **deep texture representations**

3 Corresponding author: Shumpei Ishikawa; 113-8510, [sish.gpat@mri.tmd.ac.jp](mailto:sish.gpat@mri.tmd.ac.jp), +81-3-5803-4817

4 Authors: Daisuke Komura<sup>¶1</sup>, Keisuke Fukuta<sup>¶1,2</sup>, Ken Tominaga<sup>1,3</sup>, Akihiro Kawabe<sup>1,4</sup>, Hiroto  
5 Koda<sup>1,4</sup>, Ryohei Suzuki<sup>1,5</sup>, Hiroki Konishi<sup>1,2</sup>, Toshikazu Umezaki<sup>1</sup>, Tatsuya Harada<sup>2</sup>, Shumpei  
6 Ishikawa<sup>1</sup>

7 <sup>1</sup>Department of Genomics Pathology, Medical Research Institute, Tokyo Medical and Dental  
8 University, Tokyo, Japan

9 <sup>2</sup>Graduate School of Information Science and Technology, The University of Tokyo, Tokyo, Japan

0 <sup>3</sup>Graduate School of Interdisciplinary Information Studies, The University of Tokyo, Tokyo, Japan

1 <sup>4</sup>Department of Pathology and Diagnostic Pathology, Graduate School of Medicine, The University  
2 of Tokyo, Tokyo, Japan

3 <sup>5</sup>Department of Physics, Graduate School of Science, The University of Tokyo

4 <sup>¶</sup>Contributed equally.

## 5 **Abstract**

### 6 **Background:**

7 As a large number of digital histopathological images have been accumulated, there is a growing  
8 demand of content-based image retrieval (CBIR) in pathology for educational, diagnostic, or  
9 research purposes. However, no CBIR systems in digital pathology are publicly available.

### 10 **Results:**

11 We developed a web application, the Luigi system, which retrieves similar histopathological images  
12 from various cancer cases. Using deep texture representations computed with a pre-trained  
13 convolutional neural network as an image feature in conjunction with an approximate nearest  
14 neighbor search method, the Luigi system provides fast and accurate results for any type of tissue  
15 or cell without the need for further training. In addition, users can easily submit query images of an  
16 appropriate scale into the Luigi system and view the retrieved results using our smartphone  
17 application. The cases stored in the Luigi database are obtained from The Cancer Genome Atlas  
18 with rich clinical, pathological, and molecular information. We tested the Luigi system and the  
19 smartphone application by querying typical cancerous regions from four cancer types, and  
20 confirmed successful retrieval of relevant images with both applications.

### 21 **Conclusions:**

22 The Luigi system will help students, pathologists, and researchers easily retrieve histopathological  
23 images of various cancers similar to those of the query image.

Luigi is freely available at <https://luigi-pathology.com/>.

## Keywords

Machine learning, Image analysis, Information retrieval, Neural networks, Web services

## Background

Recently, computational image analysis has been applied to the ever increasing volume of digital histopathological and medical images for many purposes[1,2]. Content-based image retrieval (CBIR) is one such application that facilitates retrieval of the most relevant images to a query image from an image database. In digital pathology, CBIR systems are useful in many situations, particularly diagnosis, education, and research. For example, CBIR systems can be used for educational purposes by students and beginner pathologists to retrieve relevant cases or histopathological images of tissues. In addition, such systems are also helpful to professional pathologists, particularly with the diagnosis of rare cases.

Several CBIR systems to retrieve similar histopathological images have been proposed[3,4]; however, to the best of our knowledge, no publicly available system has yet been released. Therefore, we developed Luigi, a novel web-based CBIR system, which allows users to easily retrieve similar histopathological images of cancer cases with various useful annotations.

The Luigi system calculates image relevance based on representations from a deep convolutional

neural network (CNN), which has achieved great success in a wide range of visual tasks. Well-trained deep neural networks provide visual features that perform well in a wide range of computer vision applications, including medical image analysis[5–8]. Although some CBIR applications have attempted to employ deep learning, such applications require label information, which is difficult to obtain in the field of pathology and is not scalable to large and various datasets. Based on the observation that pathological images, particularly of various cancer cases, potentially have textural structures and that spatial autocorrelation is often used in texture analysis, rather than using features from a CNN directly, we adopted the autocorrelation of the feature maps of a CNN pre-trained on ImageNet, which is referred to as deep texture representations[9]. This approach works remarkably well with pathological images without the necessity of additional learning processes for specific datasets. Therefore, the Luigi system is easily applicable to various tissues and scalable to a large number of histopathological images. A smartphone application was also developed that allows users to easily submit cases and view the retrieved results without the need for a dedicated system. Moreover, as all cancer cases in Luigi are retrieved from The Cancer Genome Atlas (TCGA)[10], which is a collection of more than 10000 whole slide images (WSIs) of 32 cancer types with rich clinical, pathological, and molecular information, pathologists and researchers can also obtain further insight into the molecular basis of the cancer of interest. The effectiveness of the Luigi CBIR system was demonstrated by querying typical cancerous regions.

## 2 **Implementation**

3 The Luigi system was developed with a Python back end and JavaScript front end; thus, it can be  
4 accessed by any modern JavaScript-enabled web browser with a Linux, Mac OS X, or Windows  
5 operating system. An overview of the Luigi system is shown in Figure 1.

6 The Luigi system can be used by accessing its URL via any modern web browser. Users  
7 can search relevant images relevant to a query image from the database using intuitive operations.  
8 Users can also view the cBioPortal[11] website to view clinical, pathological, and molecular  
9 information relevant to the retrieved case. Although users do not need to register accounts to use  
10 the Luigi system, if an account is registered, the system saves a history of all uploaded images.

11 The Luigi database contains WSI information for each case; however, the query and  
12 retrieved images handled by the system are patches extracted from WSIs because in most  
13 situations, users submit small regions of a whole slide with specific features[4].

14 Details about the system are described in the following sections.

15

### 16 *Retrieval system*

17 A CBIR system requires quantitative metrics that represent image “relevance.” Therefore, effective  
18 features must be extracted to compute the similarity between histopathological images. For example,  
19 the similarity of histopathological images is often considered within the context of cell structure,  
20 tissue texture, or shape of the nucleus. Many researchers have applied CBIR to medical domains

by employing hand-crafted features or classical texture features based on such information. In contrast, the Luigi system uses deep texture representations computed using a pre-trained CNN for feature extraction of images, an approach motivated by recent studies of neural style transfer[9]. The deep texture representations are computed using a correlation matrix of feature maps in a CNN layer. Here the “conv3 1” layer of VGG-16[12] was employed.

$$G_{ij} = \sum_k F_{ik} F_{jk}$$

In the above equation,  $G$ ,  $F$ , and  $k$  represent the correlation matrix, the feature maps of the CNN, and the position in the images, respectively. This manipulation, which is also called bilinear pooling, produces orderless image representations by aggregating the averages of the location-wise outer products of the feature maps. Note that this process discards some spatial information; therefore, the representations have spatial invariance, which appears to be necessary for pathological images because the similarity between two images should not be affected by the relative location of cells within the image. Because the representations are too high dimensional for practical application, the Compact Bilinear Pooling (CBP)[13] was adopted to approximate the original representations of 65536 dimensions with lower dimensions.

CBP is an approximation method of bilinear pooling using two random matrices and has good properties without the need for pre-training, unlike other dimension reduction methods, such as principal component analysis. The final representations for each image have 1024 dimensions, which demonstrated good performance when evaluating histopathological images.

0           When a query image is input into the Luigi system, deep texture representations of the  
1 image are created and rotated by 90°, 180°, and 270° to impose rotational invariance and compress  
2 the representations of each image using CBP. The system then searches for the nearest images in  
3 the database using the cosine similarity of the extracted compressed features between the query  
4 and database images.

5           To enable high-speed searching, an approximate nearest neighbor search method with the  
6 randomized kd-tree algorithm was adopted. Overall operations, including feature extraction and  
7 nearest search, require less than 2 s per image, which is sufficient for practical applications.

### 8 9 *Dataset and pre-processing*

10 An image database was created from WSIs of all cancer types in the TCGA. The SVS files of the  
11 diagnostic WSIs that include DX in the file name were downloaded from the National Cancer Institute  
12 GDC legacy archive[14]. WSIs without sufficient information, such as magnification level, were  
13 discarded. Finally, the database contained WSIs of a total of 9662 patients and 32 cancer types  
14 (Table 1). First, image patches of 256 x 256 pixels are extracted from approximately 50% of the  
15 tissue area for each WSI. The tissue area is detected using the Otsu algorithm[15]. Typically,  
16 pathologists evaluate histopathological images at multiple magnification levels; thus, patches were  
17 extracted at two unique scales (10x and 20x). Second, deep texture representations were calculated  
18 for each image patch. For memory efficiency, similar patches in the same slide were reduced. k-

means clustering ( $k = 500$ ) was adopted and only the nearest patch from each centroid was used.

Table 1. Cancer types included in the database. (placed at the end of this file)

### *User interface of the Luigi system*

Figure 2 shows the interface of the Luigi system. Users upload a histopathological image file by clicking the “Upload File” button or directly dragging and dropping the image file. The uploaded image is resized to 256 x 256 pixels, which is the same as the size of images in the database. Because this resizing process could change the texture, it is important to upload images with appropriate magnification levels to retrieve good results. Alternatively, images randomly selected from the TCGA can be input to a query by choosing the cancer types and clicking on one of the images in the lower left on the screen. Then the Luigi system will retrieve the most relevant patch in each WSI, rank each according to the cosine similarity, and initially display the top 48 relevant adrenal gland tumor cases at 10x magnification. Cancer types and magnification can be changed by clicking the names/magnifications on top of the results retrieved column. When a retrieved image is clicked, the enlarged view will appear. The enlarged image can be further input to a query by clicking “Search this” button. When the “Jump to cBioPortal” button below the enlarged image or the TCGA case ID (TCGA-XX-XXX) above each retrieved image is clicked, a new window will open and the summary of the selected case will be displayed on the cBioPortal website, which enables



the user to investigate the pathology report as well as clinical and molecular information of the case.

### *Smartphone application*

A smartphone application was also developed that allows users to directly submit appropriately scaled query images into the Luigi web application and view the retrieved images on a smartphone.

Figure 3 shows the interface of the Luigi smartphone application. First, users select a reference

image from the list. By swiping the screen, the magnification of the reference image is changed.

Then users can take a photo of their own cases by tapping anywhere in the screen. Users can easily

adjust the size of a query image using the reference image. Immediately after capturing a query

image, the top 48 relevant cases of adrenal gland tumors at the same magnification level of the

selected reference image will be displayed initially. Cancer types can be changed by swiping the

screen. Users can also access the cBioPortal website by selecting a retrieved case. Currently, only

an iOS version of the smartphone application is available, but an Android version will be developed

in the future.

## **Results**

To determine if the Luigi system can accurately retrieve relevant images and evaluate how query

images captured by the smartphone application affect the results, as compared to the original

images, the effectiveness of the Luigi system was assessed by querying some typical cancerous

regions from TCGA images. Queries and the corresponding image database used in this experiment are summarized in Table 2. For each query, the most relevant images in each WSI are retrieved and ranked according to the cosine similarity and then the averaged precision of the top 20 images for three queries in each query cancer type is calculated to measure the retrieval accuracy. For the evaluation of query images captured by the smartphone application, the original images were displayed on 24-inch 4K LCD monitor and photos were captured three times using an iPhone X camera. Then, the averaged precision was compared to that of the original query image. The query images (Figure 4), which show the typical appearance of each query cancer type, were selected by a pathologist and the retrieved images were manually evaluated by a second pathologist. Note that because these WSIs contain both cancerous and non-cancerous tissues, including normal alveolar epithelium, muscle, cartilage, red blood cells, and leukocytes, patches containing only non-cancerous regions were regarded as incorrect even if they belong to the WSIs of the correct cancer type.

Table 2. Queries and the corresponding image database used in the experiment.

| Query cancer type                                     | Abbreviation | Cancer types in the image database                                                              |
|-------------------------------------------------------|--------------|-------------------------------------------------------------------------------------------------|
| Cancerous regions of lung adenocarcinoma              | LUAD         | Lung adenocarcinoma, lung squamous cell carcinoma and mesothelioma                              |
| Cancerous regions of lung squamous cell carcinoma     | LUSC         | Lung adenocarcinoma, lung squamous cell carcinoma and mesothelioma                              |
| Cancerous regions of chromophobe renal cell carcinoma | KCP          | Chromophobe renal cell carcinoma, clear renal cell carcinoma and papillary renal cell carcinoma |
| Cancerous regions of renal                            | KRCC         | Chromophobe renal cell carcinoma, clear                                                         |

|                      |  |                                                         |
|----------------------|--|---------------------------------------------------------|
| clear cell carcinoma |  | renal cell carcinoma and papillary renal cell carcinoma |
|----------------------|--|---------------------------------------------------------|

2

3 Figure 5 presents the precision obtained by Luigi's CBP based on VGG-16, GoogLeNet  
4 (inception\_4b layer) [16] and ResNet50 (res2 layer) [17], and rotation invariant local binary pattern  
5 (LBP)[18], which is one of the common texture feature descriptors in image analysis. The figure  
6 shows that the Luigi CBP based on VGG-16 outperformed the LBP for all query types except for  
7 queries two and three in KRCC, where both methods show equally perfect results, and query three  
8 in LUSC, where LBP shows slightly better performance. Additionally, most of the incorrect images  
9 appeared similar to the query image even to experienced pathologists, as shown in Figures 6 and  
10 7, possibly because the classification of a cancer type is not always strict and various tumor tissues  
11 often contain multiple types of cancer, which frequently leads to interobserver disagreement[19].  
12 Additionally, different categories of cancers often have similar appearances in some parts of the  
13 tumors, which could be indistinguishable even by trained pathologists. For example, renal clear  
14 renal cell carcinoma looks similar to chromophobe renal cell carcinoma, as shown in Figure 6(A) ,  
15 and lung adenocarcinoma cells look similar to lung squamous cell carcinoma in some patches, as  
16 shown in Figure 7(B). The evaluation criteria used in this experiment seem to slightly decrease  
17 inevitably by such biological factors. Nevertheless, these results demonstrate that the Luigi system  
18 successfully retrieved relevant images regardless of the cancer type, which is the purpose of the  
19 system. The experimental results also showed that the retrieval accuracies were comparable among

VGG-16, GoogLeNet and ResNet50. However, the improvement of the retrieval accuracy of the VGG-16 based method over the LBP method was more stable than that of GoogLeNet and ResNet50 across the datasets. Thus, we adopted VGG-16 in the Luigi system.

Figure 8 shows a comparison of the precision of the Luigi CBP between the original query images and corresponding photos captured by the smartphone version of Luigi. The precision of the photos captured by the smartphone application was comparable to that of the original query images in KRCC and LUAD. For LUSC and KCP, the precision of the photos captured by the smartphone application was worse than that of the original image. It is possibly because the typical appearance of these cancers often looks similar to cancer cells of other types as described in the previous experiment, and the difference between them could be intolerant to noise introduced by recapturing of images with a smartphone camera. Reducing aliasing of images recaptured from an LCD monitor [20] or capturing pictures obtained with a microscope directly using smartphone adapters[21] could improve performance. Notably, in this experiment, out-of-focus pictures significantly reduced precision. Thus, photos should be large and captured from a distance farther than the shortest focal length.

## Conclusions

We developed a novel web-based CBIR application, the Luigi system, which enables pathologists, students, and researchers to retrieve cancer cases with histopathological images similar to those of

9 the query image. Experimental results showed that the Luigi system successfully retrieved relevant  
10 images. The features of Luigi system are as follows:

- 11 ● To the best of our knowledge, this is the first publicly available CBIR system with rich clinical  
12 and genomic information in the pathology field.
- 13 ● The Luigi image retrieval system uses deep texture representations to calculate the relevance  
14 metrics between pathological images.
- 15 ● This enables the Luigi system to retrieve relevant images regardless of spatial information, e.g.,  
16 the relative location of cells within the image.
- 17 ● The Luigi system does not require extra learning; thus, it is scalable to a large number of  
18 histopathological images and any type of tissue or cell can be searched without training.
- 19 ● The smartphone application allows users to easily submit query images without the need for  
20 special equipment and view the retrieved results on a smartphone.

21 We plan to evaluate the retrieval accuracy of the deep texture features from the CNN model, which  
22 is pre-trained in unsupervised way or fine-tuned using histopathological images. Each method has  
23 several issues to be resolved to improve the performance, but these are beyond the scope of this  
24 paper. For example, there are several options and hyperparameters for pre-training CNN using  
25 unsupervised learning such as learning methods (e.g. Restricted Boltzmann Machine, autoencoder,  
26 or Generative Adversarial Network), network structures, and learning rates. Fine-tuning could help  
27 improve the performance if histopathological images can be prepared with appropriate labels of

various tissue types with an unbiased way. Although these ideas have not yet been implemented, we believe that the performance of the Luigi system is both satisfactory and practical.

## Availability and requirements

Project name: Luigi

Webserver: <https://luigi-pathology.com/>

iPhone application: available on the Apple iTunes store as “Luigi”

Operating systems: Platform independent (Webserver), iOS 10.0 or later (iPhone application)

Programming language: Python and Javascript (Webserver), Swift (iPhone application)

Other requirements: Firefox, Chrome, IE, or Safari. JavaScript must be enabled (Webserver).

License: None

Any restrictions to use by non-academics: Luigi cannot be used for commercial use.

## Abbreviations

CBIR, Content-based image retrieval; CNN, convolutional neural network; TCGA, The Cancer Genome Atlas; WSI, whole slide image; CBP, Compact Bilinear Pooling.

## Declarations

*Ethics approval*

All image data related to human subjects used for this study is de-identified and publicly available from The Cancer Genome Atlas project. Therefore, this research is not classified as a human subject research and no Institutional Review Board approval is required.

#### *Consent for publication*

Not applicable

#### *Availability of data and materials*

The image datasets analyzed in this study are available in the National Cancer Institute GDC Data Portal, <https://portal.gdc.cancer.gov/>

#### *Funding*

This work was supported by the Japan Society for the Promotion of Science Grant-in-Aid for Scientific Research (A) [16H02481 to S.I.], by the Practical Research for Innovative Cancer Control from Japan Agency for Medical Research and development (S.I.), and by the Joint Usage/Research Program of Medical Research Institute, Tokyo Medical and Dental University (D.K., S.I.).

#### *Competing interests*

There are no competing interests.

6

## 7 References

- 8 1. Yu K-H, Zhang C, Berry GJ, Altman RB, Ré C, Rubin DL, et al. Predicting non-small cell lung  
9 cancer prognosis by fully automated microscopic pathology image features. *Nat Commun.*  
10 2016;7:12474.
- 11 2. Kothari S, Phan JH, Stokes TH, Wang MD. Pathology imaging informatics for quantitative  
12 analysis of whole-slide images. *J Am Med Inform Assoc.* 2013;20:1099–108.
- 13 3. Zhang X, Liu W, Dundar M, Badve S, Zhang S. Towards Large-Scale Histopathological Image  
14 Analysis: Hashing-Based Image Retrieval. *IEEE Trans Med Imaging.* 2015;34:496–506.
- 15 4. Qi X, Wang D, Rodero I, Diaz-Montes J, Gensure RH, Xing F, et al. Content-based  
16 histopathology image retrieval using CometCloud. *BMC Bioinformatics.* 2014;15:287.
- 17 5. Xu J, Luo X, Wang G, Gilmore H, Madabhushi A. A Deep Convolutional Neural Network for  
18 segmenting and classifying epithelial and stromal regions in histopathological images.  
19 *Neurocomputing.* 2016;191:214–23.
- 20 6. Litjens G, Sánchez CI, Timofeeva N, Hermsen M, Nagtegaal I, Kovacs I, et al. Deep learning as  
21 a tool for increased accuracy and efficiency of histopathological diagnosis. *Sci Rep.* 2016;6:26286.
- 22 7. Hou L, Samaras D, Kurc TM, Gao Y, Davis JE, Saltz JH. Patch-based Convolutional Neural  
23 Network for Whole Slide Tissue Image Classification. *ArXiv150407947 Cs [Internet].* 2015 [cited  
24 2017 May 18]; Available from: <http://arxiv.org/abs/1504.07947>
- 25 8. Kleesiek J, Urban G, Hubert A, Schwarz D, Maier-Hein K, Bendszus M, et al. Deep MRI brain  
26 extraction: A 3D convolutional neural network for skull stripping. *NeuroImage.* 2016;129:460–9.
- 27 9. Gatys LA, Ecker AS, Bethge M. Image style transfer using convolutional neural networks. *Proc*  
28 *IEEE Conf Comput Vis Pattern Recognit.* 2016. p. 2414–2423.
- 29 10. Weinstein JN, Collisson EA, Mills GB, Shaw KRM, Ozenberger BA, Ellrott K, et al. The cancer  
30 genome atlas pan-cancer analysis project. *Nat Genet.* 2013;45:1113–1120.
- 31 11. Cerami E, Gao J, Dogrusoz U, Gross BE, Sumer SO, Aksoy BA, et al. The cBio cancer  
32 genomics portal: an open platform for exploring multidimensional cancer genomics data. *AACR*;  
33 2012.
- 34 12. Simonyan K, Zisserman A. Very deep convolutional networks for large-scale image  
35 recognition. *ArXiv Prepr ArXiv14091556.* 2014;
- 36 13. Gao Y, Beijbom O, Zhang N, Darrell T. Compact Bilinear Pooling. *ArXiv151106062 Cs*  
37 *[Internet].* 2015; Available from: <http://arxiv.org/abs/1511.06062>
- 38 14. National Cancer Institute GDC Data Portal [Internet]. [cited 2017 May 29]. Available from:  
39 <https://portal.gdc.cancer.gov/>
- 0 15. Otsu N. A Threshold Selection Method from Gray-Level Histograms. *IEEE Trans Syst Man*  
1 *Cybern.* 1979;9:62–6.



16. Szegedy C, Liu W, Jia Y, Sermanet P, Reed S, Anguelov D, et al. Going Deeper with Convolutions. ArXiv14094842 Cs [Internet]. 2014 [cited 2018 Feb 14]; Available from: <http://arxiv.org/abs/1409.4842>
17. He K, Zhang X, Ren S, Sun J. Deep Residual Learning for Image Recognition. ArXiv151203385 Cs [Internet]. 2015 [cited 2018 Feb 14]; Available from: <http://arxiv.org/abs/1512.03385>
18. Multiresolution gray-scale and rotation invariant texture classification with local binary patterns - IEEE Journals & Magazine [Internet]. [cited 2018 Feb 14]. Available from: <http://ieeexplore.ieee.org/document/1017623/>
19. Longacre TA, Ennis M, Quenneville LA, Bane AL, Bleiweiss IJ, Carter BA, et al. Interobserver agreement and reproducibility in classification of invasive breast carcinoma: an NCI breast cancer family registry study. *Mod Pathol*. 2005;19:195–207.
20. Muammar H, Dragotti PL. An investigation into aliasing in images recaptured from an LCD monitor using a digital camera. 2013 IEEE Int Conf Acoust Speech Signal Process. 2013. p. 2242–6.
21. Roy S, Pantanowitz L, Amin M, Seethala RR, Ishtiaque A, Yousem SA, et al. Smartphone adapters for digital photomicrography. *J Pathol Inform*. 2014;5:24.

## Figures

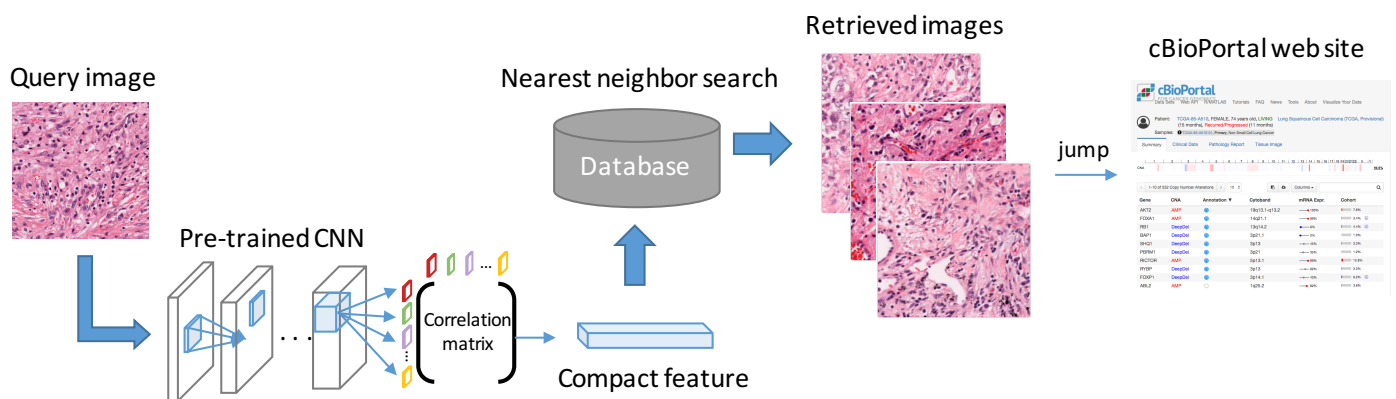

**Figure 1. Overview of the Luigi system.** After submitting the query image, deep texture representations are calculated and compressed by compact bilinear pooling, and the 48 most similar images are retrieved. Users can view the retrieved cases on the cBioPortal website by clicking the link to the selected cases.

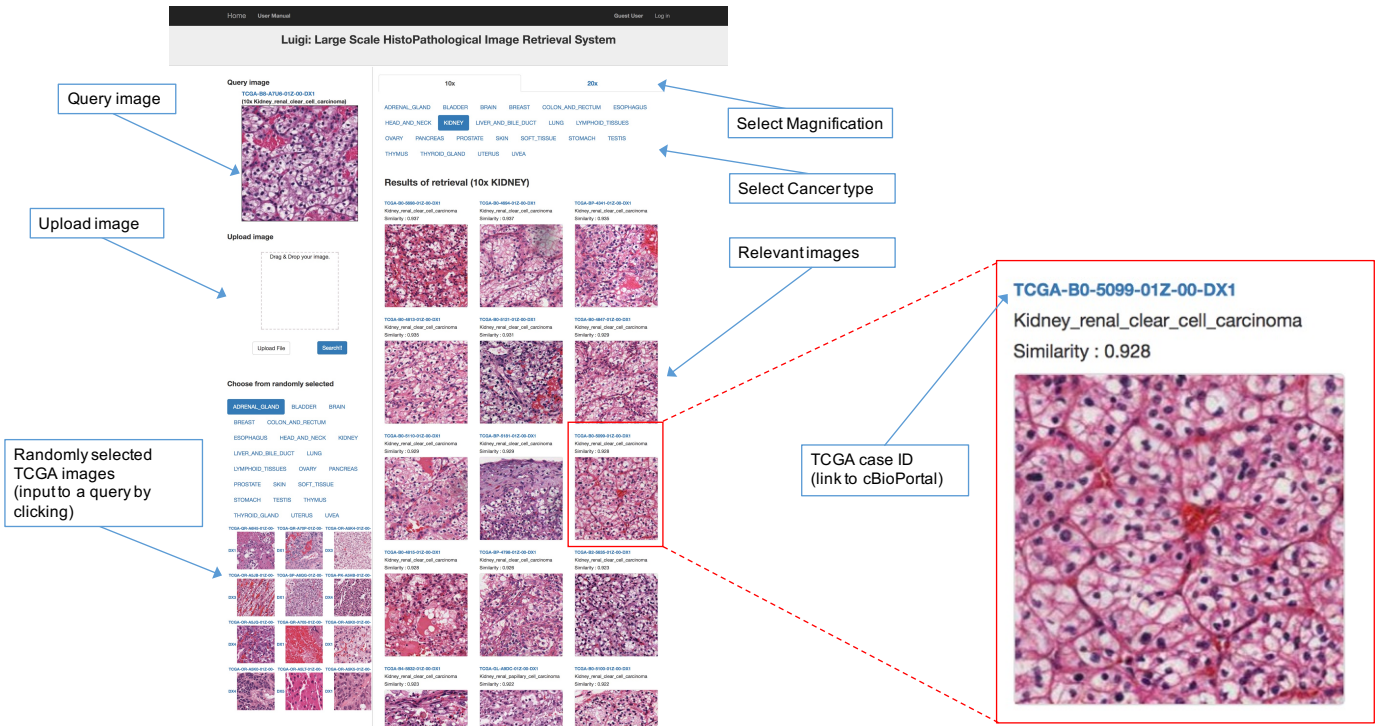

7  
8 **Figure 2. Graphical interface of the Luigi webserver.**

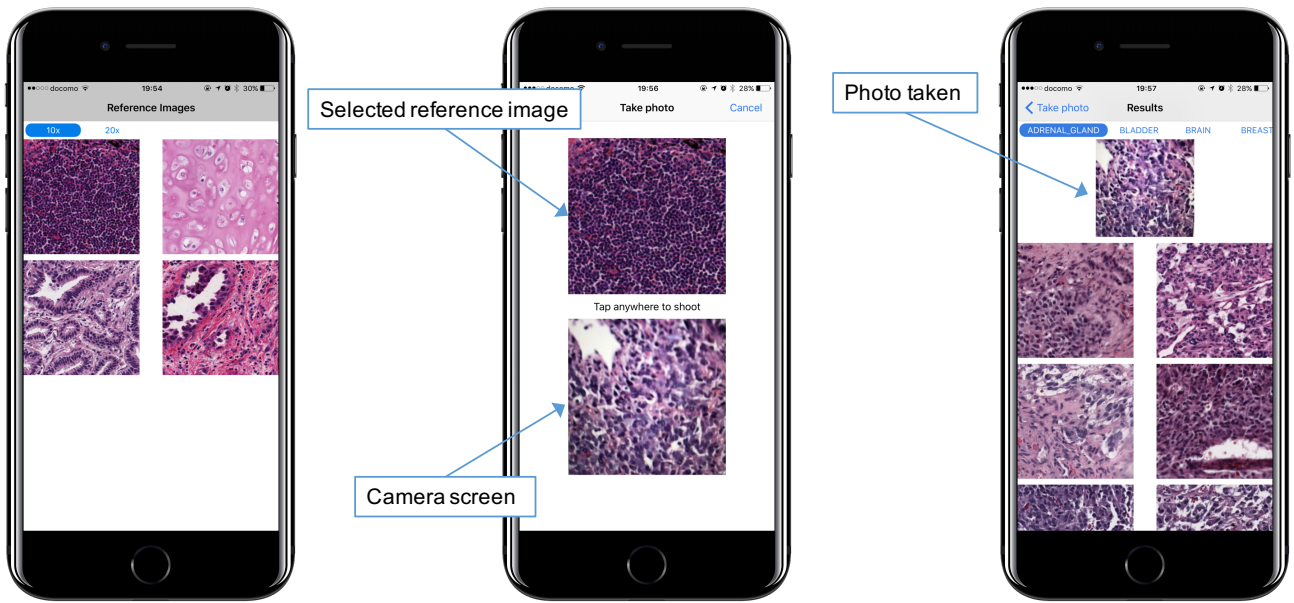

- 9
1. Select a reference image and magnification
  2. Take a photo of histopathological image
  3. Display similar histopathological images by cancer type

10  
11 **Figure 3. Graphical interface and usage of the Luigi smartphone application.**

**KCP**

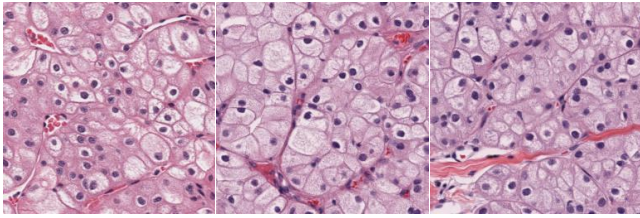

**KRCC**

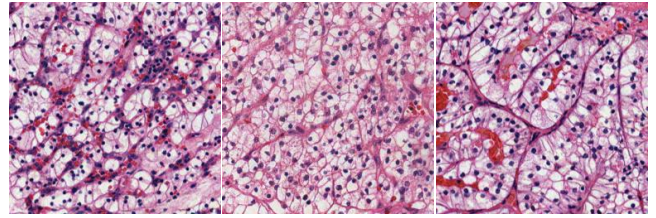

**LUAD**

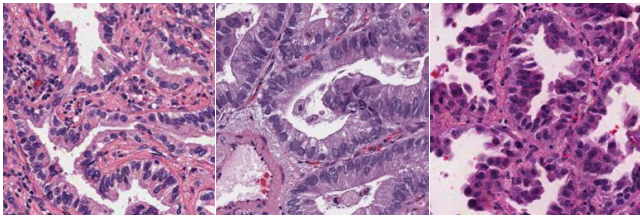

**LUSC**

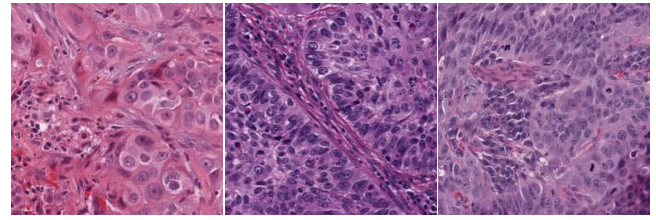

.3

.4

**Figure 4. Query images of four cancer types used in the experiment.**

.5

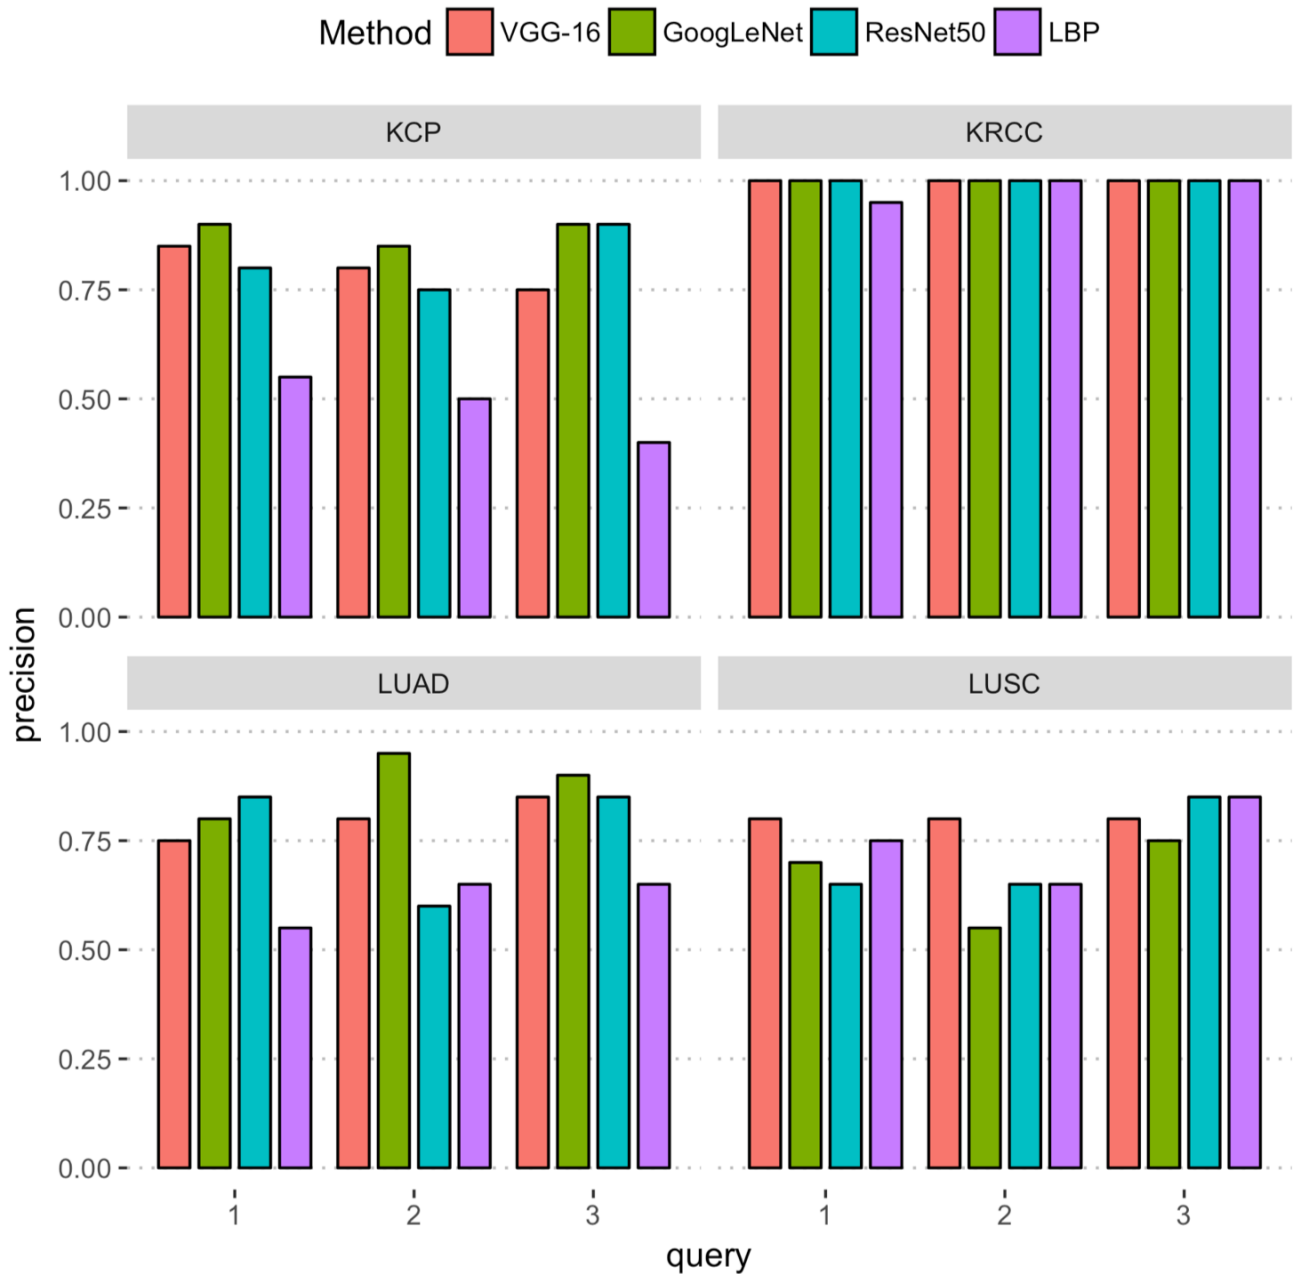

**Figure 5. Retrieval results for a representative histopathological image in kidney cancer. A)**

kidney chromophobe renal cell carcinoma, B) kidney clear renal cell carcinoma. These results were

obtained using the deep textures based on the VGG-16 model. The query image is shown on the

top and the top five (six in kidney chromophobe renal cell carcinoma to show the incorrectly retrieved

image) retrieved images are shown on the bottom. The case ID, cancer type case and cosine

similarity to the query image of each case are shown above the retrieved image. Retrieved images

of different cancer types matching the query image are highlighted in green boxes.

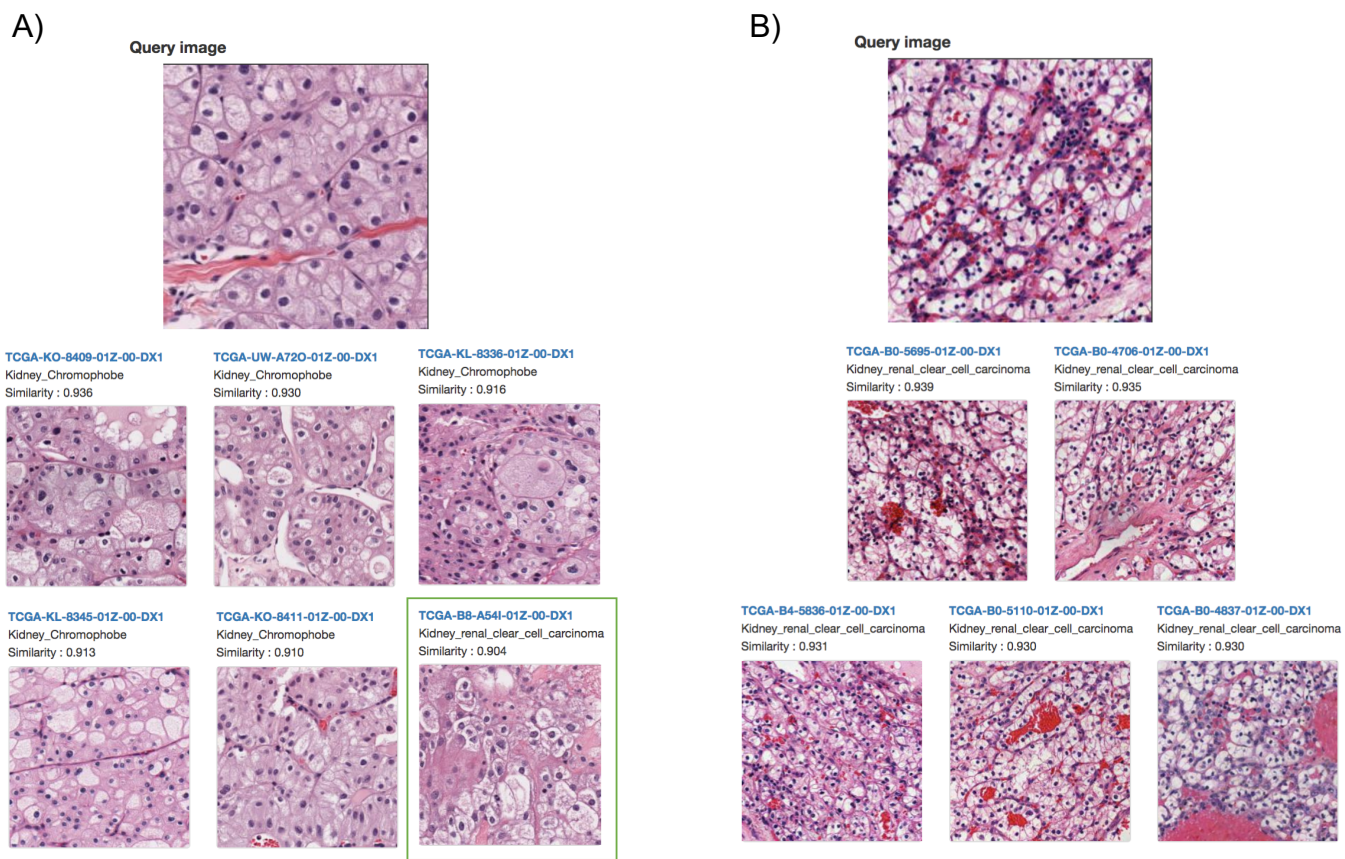

5

6 **Figure 6. Retrieval results for a representative histopathological image in lung cancer. A)**

7 Lung adenocarcinoma, and B) lung squamous cell carcinoma. These results were obtained using

8 the deep textures based on the VGG-16 model. The query image is shown on the top and the top

9 five retrieved images are shown in the bottom. The case ID, cancer type case and cosine similarity

10 to query image of each case are shown above the retrieved image. Retrieved images of different

11 cancer types matching the query image are highlighted in green boxes.

12

A)

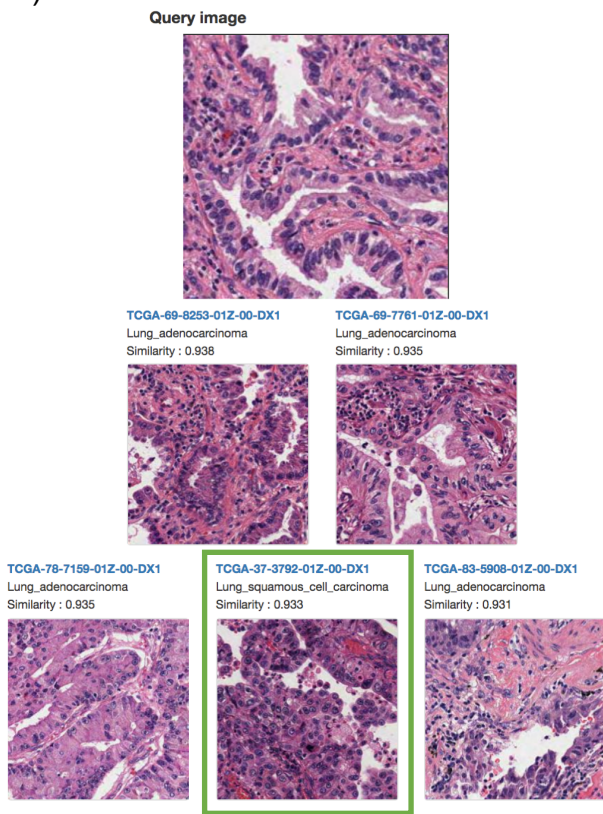

B)

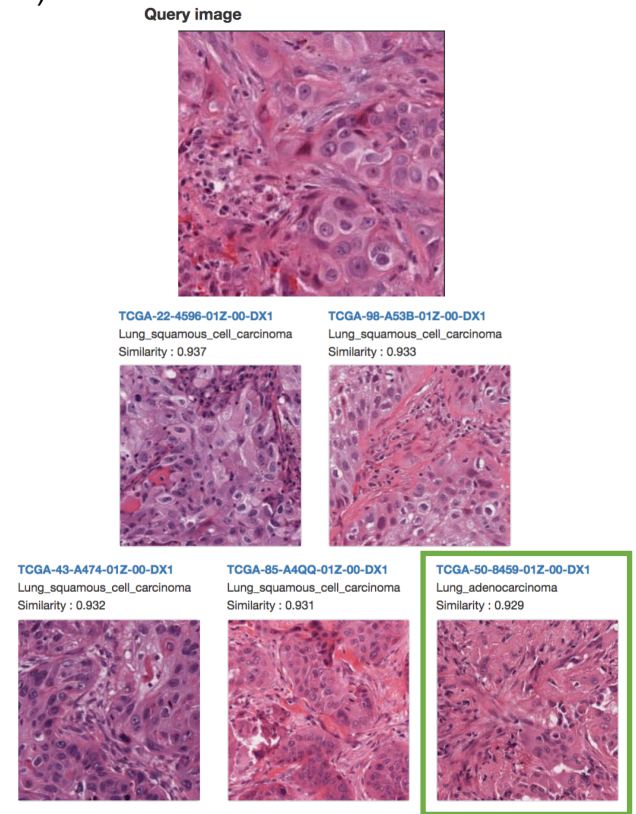

3  
4 **Figure 7. The precision of Luigi and LBP on The Cancer Genome Atlas dataset.** Precision of  
5 Luigi based on VGG-16, GoogLeNet and ResNet50, and LBP are compared.  
6

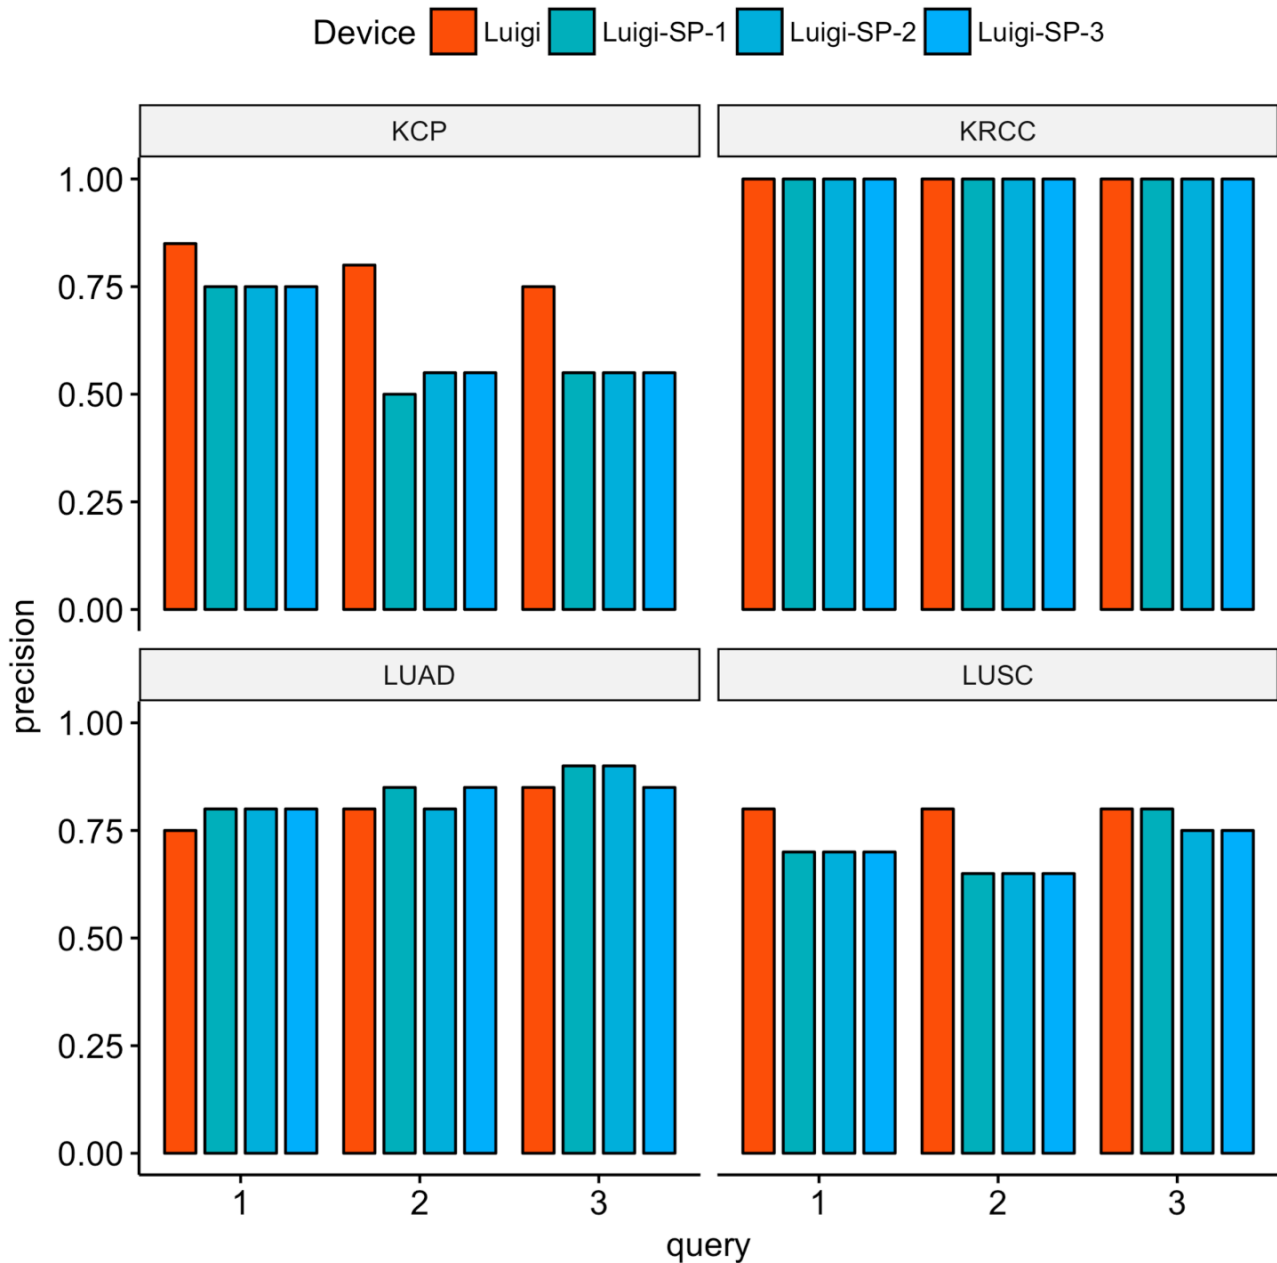

7

8 **Figure 8** The precision of original image as the query and the images captured with  
 9 **smartphone camera on The Cancer Genome Atlas dataset.** Precision of the original images as  
 0 the query and images captured three times with the Luigi smartphone application (Luigi-SP) are  
 1 compared. The VGG-16-based model was used in this experiment.

2

3

4 Table 1.

| Cancer type                              | Primary site     | No. of<br>WSIs | Total number of patches |        |        |
|------------------------------------------|------------------|----------------|-------------------------|--------|--------|
|                                          |                  |                | 10x                     | 20x    | all    |
| Breast invasive carcinoma                | breast           | 877            | 389063                  | 399085 | 788148 |
| Glioblastoma multiforme                  | brain            | 843            | 359962                  | 297098 | 657060 |
| Brain Lower Grade Glioma                 | brain            | 839            | 362770                  | 394721 | 757491 |
| Lung adenocarcinoma                      | lung             | 531            | 236504                  | 250193 | 486697 |
| Lung squamous cell carcinoma             | lung             | 513            | 241379                  | 247785 | 489164 |
| Sarcoma                                  | soft tissue      | 459            | 223421                  | 225394 | 448815 |
| Uterine Corpus Endometrial<br>Carcinoma  | uterus           | 436            | 212300                  | 214589 | 426889 |
| Thyroid carcinoma                        | thyroid gland    | 386            | 185600                  | 189073 | 374673 |
| Head and neck squamous cell<br>carcinoma | head and neck    | 359            | 170667                  | 175926 | 346593 |
| Skin cutaneous melanoma                  | skin             | 350            | 162835                  | 166252 | 329087 |
| Bladder urothelial carcinoma             | bladder          | 346            | 167386                  | 170306 | 337692 |
| Colon adenocarcinoma                     | colon and rectum | 344            | 163231                  | 159588 | 322819 |
| Prostate adenocarcinoma                  | prostate         | 334            | 150099                  | 161509 | 311608 |
| Kidney renal clear cell carcinoma        | kidney           | 302            | 130550                  | 180998 | 311548 |
| Stomach adenocarcinoma                   | stomach          | 301            | 136517                  | 136087 | 272604 |



|                                                                     |                     |     |        |        |        |
|---------------------------------------------------------------------|---------------------|-----|--------|--------|--------|
| Liver hepatocellular carcinoma                                      | liver and bile duct | 295 | 143196 | 146434 | 289630 |
| Kidney renal papillary cell carcinoma                               | kidney              | 233 | 106300 | 112606 | 218906 |
| Cervical squamous cell carcinoma<br>and endocervical adenocarcinoma | uterus              | 215 | 91273  | 102470 | 193743 |
| Testicular germ cell tumors                                         | testis              | 206 | 99143  | 101736 | 200879 |
| Adrenocortical carcinoma                                            | adrenal gland       | 167 | 83040  | 83257  | 166297 |
| Pancreatic adenocarcinoma                                           | pancreas            | 158 | 71518  | 76836  | 148354 |
| Pheochromocytoma and<br>paraganglioma                               | adrenal gland       | 147 | 71778  | 72902  | 144680 |
| Thymoma                                                             | thymus              | 131 | 61977  | 63728  | 125705 |
| Rectum adenocarcinoma                                               | colon and rectum    | 125 | 59109  | 55031  | 114140 |
| Esophageal carcinoma                                                | esophagus           | 114 | 53037  | 55985  | 109022 |
| Kidney chromophobe                                                  | kidney              | 93  | 43960  | 46075  | 90035  |
| Ovarian serous cystadenocarcinoma                                   | ovary               | 84  | 40961  | 42002  | 82963  |
| Uterine carcinosarcoma                                              | uterus              | 73  | 35274  | 35391  | 70665  |
| Mesothelioma                                                        | lung                | 71  | 30656  | 30861  | 61517  |
| Uveal melanoma                                                      | uvea                | 55  | 27164  | 24437  | 51601  |
| Lymphoid neoplasm diffuse large B-<br>cell lymphoma                 | lymphoid tissues    | 33  | 14875  | 14852  | 29727  |

|                    |                     |    |       |       |       |
|--------------------|---------------------|----|-------|-------|-------|
| Cholangiocarcinoma | liver and bile duct | 30 | 14896 | 15000 | 29896 |
|--------------------|---------------------|----|-------|-------|-------|
